# Supplementary material for: Effectiveness of Collaborative Care for Depression and HbA1c in Patients with Depression and Diabetes: A Systematic Review and Meta-Analysis
Source: PubMed Central journal article supplement (PMC9438466; doi:10.5334/ijic.6443), 2022-08-30
Supplement: ijic-22-3-6443-s1.pdf [file ijic-22-3-6443-s1.pdf]

## Supplementary

### Appendix 1: search strategy

#### PsycInfo:

#1 MA diabetes mellitus OR MA diabetes complications OR AB diabetes  
OR (AB "IDDM" OR AB "NIDDM" OR AB "MODY" OR AB "T1DM" OR AB "T2DM" OR AB  
"T1D" OR AB "T2D")  
NOT (MA diabetes insipidus OR ( (AB diabetes OR AB insipidus) )) (29921)

#2 MA depression OR MA depressive disorder  
OR (AB depress\* AND AB disorder\*)  
OR (AB depress\* AND AB symptom\*)  
OR (AB depress\* AND AB score\*)  
OR (AB depress\* AND AB scale\*)  
OR (AB depress\* AND AB unipolar)  
OR ("affective disorder" OR AB "mood disorder") (256450)

#3 MA "patient care planning" OR TX "patient centered care" OR  
OR MA Delivery of Health Care, Integrated OR MA comprehensive health care OR AB  
"comprehensive health care" OR AB "community based" OR MA Patient-Centered Care OR MA  
Patient Care Management  
OR AB "patient management" OR MA Community Health Services OR MA Primary Health Care  
OR MA case management  
OR AB "case management"  
OR (AB "multidisciplinary care OR AB "multidisciplinary health" OR AB "multidisciplinary  
delivery" OR AB "multidisciplinary system" OR AB "multidisciplinary team")  
OR (AB "collaborative care" OR AB "collaborative health" OR AB "collaborative delivery" OR  
AB "collaborative system" OR AB "collaborative team")  
OR (AB "interdisciplinary care" OR AB "interdisciplinary health" OR AB "interdisciplinary  
delivery" OR AB "interdisciplinary system" OR AB "interdisciplinary team" )  
OR (AB "integrated care" OR AB "integrated health" OR AB "integrated delivery" OR AB  
"integrated system" OR AB "integrated team" )  
OR (AB "shared care" OR AB "shared health" OR AB "shared delivery OR AB "shared system"  
OR AB "shared team")  
OR (AB "joint care" OR AB "joint health" OR AB "joint delivery OR AB "joint system" OR AB  
"joint team") (58137)

#4 (MA randomized controlled trials OR MA random allocation OR MA double-blind method OR  
MA single-blind method OR MA clinical trial  
OR TX "clinical trial"  
OR (AB "single blind" OR AB "double blind" OR AB "triple blind")  
OR TX random\* OR TX placebo  
OR TX "controlled trial" OR TX "controlled method" OR TX "controlled study"  
OR TX "prospective trial" OR TX "prospective method" OR TX "prospective study"

OR TX crossover trial OR TX crossover design  
OR TX cross-over trial OR TX cross-over design)  
NOT (MA animal AND NOT (MA animal AND MA human)) (304255)  
#1 AND #2 AND #3 AND #4 (54)

CINAHL:

#1 MH diabetes mellitus OR MH diabetes complications OR AB diabetes  
OR (AB "IDDM" OR AB "NIDDM" OR AB "MODY" OR AB "T1DM" OR AB "T2DM" OR AB  
"T1D" OR AB "T2D")  
NOT (MH diabetes insipidus OR ( (AB diabetes OR AB insipidus) )) (169194)

#2 MH depression OR MH depressive disorder  
OR (AB depress\* AND AB disorder\*)  
OR (AB depress\* AND AB symptom\*)  
OR (AB depress\* AND AB score\*)  
OR (AB depress\* AND AB scale\*)  
OR (AB depress\* AND AB unipolar)  
OR (AB "affective disorder" OR AB "mood disorder") (151076)

#3 TX "patient centered care" OR MH Delivery of Health Care, Integrated  
OR MH comprehensive health care OR AB "comprehensive health care" OR AB "community  
based"  
OR MH Patient-Centered Care OR MH Patient Care Management OR AB "patient management"  
OR MH Community Health Services OR MH Primary Health Care OR AB case management OR  
AB "case management"  
OR (AB "multidisciplinary care OR AB "multidisciplinary health" OR AB "multidisciplinary  
delivery" OR AB "multidisciplinary system" OR AB "multidisciplinary team")  
OR (AB "collaborative care" OR AB "collaborative health" OR AB "collaborative delivery" OR  
AB "collaborative system" OR AB "collaborative team")  
OR (AB "interdisciplinary care" OR AB "interdisciplinary health" OR AB "interdisciplinary  
delivery" OR AB "interdisciplinary system" OR AB "interdisciplinary team" )  
OR (AB "integrated care" OR AB "integrated health" OR AB "integrated delivery" OR AB  
"integrated system" OR AB "integrated team" )  
OR (AB "shared care" OR AB "shared health" OR AB "shared delivery OR AB "shared system"  
OR AB "shared team")  
OR (AB "joint care" OR AB "joint health" OR AB "joint delivery OR AB "joint system" OR AB  
"joint team") (158178)

#4 (MH randomized controlled trials OR MH random allocation OR MH double-blind method OR  
MH single blind method OR MH clinical trial  
OR TX "clinical trial"  
OR AB "single blind" OR AB "double blind" OR AB "triple blind"  
OR TX random\* OR TX placebo  
OR TX "controlled trial" OR TX "controlled method" OR TX "controlled study"  
OR TX "prospective trial" OR TX "prospective method" OR TX "prospective study"  
OR TX "crossover trial" OR TX "crossover design"  
OR TX "cross-over trial" OR TX "cross-over design")  
NOT (MH animal NOT (MH animal AND MH human)) (745216)  
#1 AND #2 AND #3 AND #4 (109)



Cochrane:

- #1 MeSH descriptor: [Diabetes Mellitus] explode all trees
- #2 MeSH descriptor: [Diabetes Complications] explode all trees
- #3 diabetes:ti,ab
- #4 IDDM:ti,ab
- #5 NIDDM:ti,ab
- #6 MODY:ti,ab
- #7 T1DM:ti,ab
- #8 T2DM:ti,ab
- #9 T1D:ti,ab
- #10 T2D:ti,ab
- #11 #1 OR #2 OR #3 OR #4 OR #5 OR #6 OR #7 OR #8 OR #9 OR #10
- #12 MeSH descriptor: [Diabetes Insipidus] explode all trees
- #13 diabetes:ab,ti AND insipidus:ti,ab
- #14 #12 OR #13
- #15 #11 NOT #14
- #16 MeSH descriptor: [Depression] explode all trees
- #17 MeSH descriptor: [Depressive Disorder] explode all trees
- #18 (depress\*) adj3 (disorder\*):ti,ab
- #19 (depress\*) adj3 (symptom\*):ti,ab
- #20 (depress\*) adj3 (score\*):ti,ab
- #21 (depress\*) adj3 (scale\*):ti,ab
- #22 (depress\* near/3 unipolar):ti,ab
- #23 #18 OR #19 OR #20 OR #21 OR #22
- #24 "affective disorder":ti,ab
- #25 "mood disorder":ti,ab
- #26 #16 OR #17 OR #23 OR #24 OR #25
- #27 MeSH descriptor: [Patient Care Planning] explode all trees
- #28 "patient centered care"
- #29 "multidisciplinary care":ti,ab or "multidisciplinary health":ti,ab or "multidisciplinary delivery":ti,ab or "multidisciplinary system":ti,ab or "multidisciplinary team":ti,ab
- #30 "interdisciplinary care":ti,ab or "interdisciplinary health":ti,ab or "interdisciplinary delivery":ti,ab or "interdisciplinary system":ti,ab or "interdisciplinary team":ti,ab
- #31 "integrated care":ti,ab or "integrated health":ti,ab or "integrated delivery":ti,ab or "integrated system":ti,ab or "integrated team":ti,ab
- #32 "collaborative care":ti,ab or "collaborative health":ti,ab or "collaborative delivery":ti,ab or "collaborative system":ti,ab or "collaborative team":ti,ab
- #33 "shared care":ti,ab or "shared health":ti,ab or "shared delivery":ti,ab or "shared system":ti,ab or "shared team":ti,ab
- #34 "joint care":ti,ab or "joint health":ti,ab or "joint delivery":ti,ab or "joint system":ti,ab or "joint team":ti,ab
- #35 #29 OR #30 OR #31 OR #32 OR #33 OR #34
- #36 MeSH descriptor: [Delivery of Health Care, Integrated] explode all trees
- #37 MeSH descriptor: [Comprehensive Health Care] explode all trees

#38 "comprehensive health care":ti,ab  
 #39 "community based":ti,ab  
 #40 MeSH descriptor: [Patient-Centered Care] explode all trees  
 #41 MeSH descriptor: [Patient Care Management] explode all trees  
 #42 "patient management":ti,ab  
 #43 MeSH descriptor: [Community Health Services] explode all trees  
 #44 MeSH descriptor: [Primary Health Care] explode all trees  
 #45 MeSH descriptor: [Case Management] explode all trees  
 #46 "case management":ti,ab  
 #47 #27 OR #28 OR #35 #36 #37 OR #38 #39 OR #40 OR #41 OR #42 OR #43 OR #44 #45 OR  
 #46  
 #48 (randomized controlled trial):pt  
 #49 MeSH descriptor: [Randomized Controlled Trial] explode all trees  
 #50 MeSH descriptor: [Random Allocation] explode all trees  
 #51 MeSH descriptor: [Double-Blind Method] explode all trees  
 #52 MeSH descriptor: [Single-Blind Method] explode all trees  
 #53 (clinical trial):pt  
 #54 MeSH descriptor: [Clinical Trial] explode all trees  
 #55 "clinical trial".ti,ab  
 #56 "single blind":ti,ab or "double blind":ti,ab or "triple blind":ti,ab  
 #57 random\*  
 #58 placebo  
 #59 "controlled trial" or "controlled method" or "controlled study"  
 #60 "prospective trial" or "prospective method" or "prospective study"  
 #61 "crossover trial" or "crossover design"  
 #62 "cross-over trial" or "cross-over design"  
 #63 #48 OR #49 OR #50 OR #51 OR #52 OR #53 OR #54 OR #55 OR #56 OR #57 OR #58 OR  
 #59 OR #60 OR #61 OR #62  
 #64 #15 AND #26 AND #47 AND #63 (129)

PubMed:

- #1 "diabetes mellitus"[MeSH Terms]
- #2 "diabetes complications"[MeSH Terms]
- #3 "diabetes"[Title/Abstract]
- #4 "IDDM"[Title/Abstract] OR "NIDDM"[Title/Abstract] OR "MODY"[Title/Abstract] OR "T1DM"[Title/Abstract] OR "T2DM"[Title/Abstract] OR "T1D"[Title/Abstract] OR "T2D"[Title/Abstract]
- #5 #1 OR #2 OR #3 OR #4
- #6 "diabetes insipidus"[MeSH Terms]
- #7 "diabetes"[Title/Abstract] AND "insipidus"[Title/Abstract]
- #8 #6 OR #7
- #9 #5 NOT #8
- #10 "depression"[MeSH Terms]
- #11 "depressive disorder"[MeSH Terms]
- #12 "depress\*"[Title/Abstract] AND "disorder\*"[Title/Abstract]
- #13 "depress\*"[Title/Abstract] AND "symptom\*"[Title/Abstract]
- #14 "depress\*"[Title/Abstract] AND "score\*"[Title/Abstract]
- #15 "depress\*"[Title/Abstract] AND "scale\*"[Title/Abstract]
- #16 "depress\*"[Title/Abstract] AND "unipolar"[Title/Abstract]
- #17 #12 OR #13 OR #14 OR #15 OR #16
- #18 affective disorder\*[Title/Abstract]
- #19 mood disorder\*[Title/Abstract]
- #20 #10 OR #11 OR #17 OR #18 OR #19
- #21 "patient care planning"[MeSH Terms]
- #22 "patient centered care"[Text Word]
- #23 "delivery of health care, integrated"[MeSH Terms]
- #24 "comprehensive health care"[MeSH Terms]
- #25 "comprehensive health care"[Title/Abstract]
- #26 "community based"[Title/Abstract]
- #27 "patient-centered care"[MeSH Terms]
- #28 "patient care management"[MeSH Terms]
- #29 "patient management"[Title/Abstract]
- #30 "community health services"[MeSH Terms]
- #31 "primary health care"[MeSH Terms]
- #32 "case management"[MeSH Terms]
- #33 "case management"[Title/Abstract]
- #34 collaborative care[Title/Abstract] OR collaborative health[Title/Abstract] OR collaborative delivery [Title/Abstract] OR collaborative system[Title/Abstract] OR collaborative team[Title/Abstract]
- #35 integrated care[Title/Abstract] OR integrated health[Title/Abstract] OR integrated delivery [Title/Abstract] OR integrated system[Title/Abstract] OR integrated team[Title/Abstract]
- #36 interdisciplinary care[Title/Abstract] OR interdisciplinary health[Title/Abstract] OR interdisciplinary delivery [Title/Abstract] OR interdisciplinary system[Title/Abstract] OR interdisciplinary team[Title/Abstract]

#37 multidisciplinary care[Title/Abstract] OR multidisciplinary health[Title/Abstract] OR multidisciplinary delivery [Title/Abstract] OR multidisciplinary system[Title/Abstract] OR multidisciplinary team[Title/Abstract]

#38 shared care[Title/Abstract] OR shared health[Title/Abstract] OR shared delivery [Title/Abstract] OR shared system[Title/Abstract] OR shared team[Title/Abstract]

#39 joint care[Title/Abstract] OR joint health[Title/Abstract] OR joint delivery [Title/Abstract] OR joint system[Title/Abstract] OR joint team[Title/Abstract]

#40 #21 OR #22 OR #23 OR #24 OR #25 OR #26 OR #27 OR #28 OR #29 OR #30 OR #31 OR #32 OR #33 OR #34 OR #35 OR #36 OR #37 OR #38 OR #39

#41 "randomized controlled trial"[Publication Type]

#42 "random allocation"[MeSH Terms]

#43 "double-blind method"[MeSH Terms]

#44 "single-blind method"[MeSH Terms]

#45 "clinical trial"[Publication Type]

#46 "clinical trial"[Text Word]

#47 single blind[Title/Abstract] OR double blind[Title/Abstract] OR triple blind[Title/Abstract]

#48 "random\*"[Text Word]

#59 "placebo"[Text Word]

#50 controlled trial[Text Word] OR controlled method[Text Word] OR controlled study[Text Word]

#51 prospective trial[Text Word] OR prospective method[Text Word] OR prospective study[Text Word]

#52 crossover trial[Text Word] OR crossover design[Text Word]

#53 cross-over trial[Text Word] OR cross-over design[Text Word]

#54 #41 OR #42 OR #43 OR #44 OR #45 OR #46 OR #47 OR #48 OR #49 OR #50 OR #51 OR #52 OR #53

#55 animal[MeSH Terms]

#56 human[MeSH Terms]

#57 #55 AND #56

#58 #55 NOT #57

#59 #54 NOT #58

#61 #9 AND #20 AND #40 AND #59 (343)



Scopus:

#1 (INDEXTERMS ( "diabetes mellitus" ) OR INDEXTERMS ( "diabetes complications" ) OR TITLE-ABS ( diabetes ) OR TITLE-ABS ( "IDDM" ) OR TITLE-ABS ( "NIDDM" ) OR TITLE-ABS ( "MODY" ) OR TITLE-ABS ( "T1DM" ) OR TITLE-ABS ( "T2DM" ) OR TITLE-ABS ( "T1D" ) OR TITLE-ABS ( "T2D" )) AND NOT ( INDEXTERMS ( "diabetes insipidus" ) OR ( TITLE-ABS ( diabetes ) AND TITLE-ABS ( "insipidus" ) ) ) (881789)

#2 INDEXTERMS(depression) OR INDEXTERMS("depressive disorder") OR (TITLE-ABS(depress\* ) PRE/3 (TITLE-ABS(disorder\*) OR TITLE-ABS("symptom\*") OR TITLE-ABS("score\*") OR TITLE-ABS("scale\*"))) OR (TITLE-ABS("unipolar") W/3 TITLE-ABS("depressi\*")) OR (TITLE-ABS("affective disorder\*") OR TITLE-ABS("mood disorder\*")) (564418)

#3 ("patient care planning") OR ALL("patient centered care")OR INDEXTERMS("delivery of health care, integrated") OR INDEXTERMS("comprehensive health care") OR TITLE-ABS("comprehensive health care") OR TITLE-ABS("community based") OR INDEXTERMS("patient-centered care") OR INDEXTERMS("patient care management") OR TITLE-ABS("patient management") OR INDEXTERMS("community health services") OR INDEXTERMS("primary health care") OR INDEXTERMS("case management") OR TITLE-ABS("case management") OR TITLE-ABS("collaborative care") OR TITLE-ABS("collaborative health") OR TITLE-ABS("collaborative delivery") OR TITLE-ABS("collaborative system") OR TITLE-ABS("collaborative team") OR TITLE-ABS("integrated care") OR TITLE-ABS("integrated health") OR TITLE-ABS("integrated delivery") OR TITLE-ABS("integrated system") OR TITLE-ABS("integrated team") OR TITLE-ABS("interdisciplinary care") OR TITLE-ABS("interdisciplinary health") OR TITLE-ABS("interdisciplinary delivery") OR TITLE-ABS("interdisciplinary system") OR TITLE-ABS("interdisciplinary team") OR TITLE-ABS("multidisciplinary care") OR TITLE-ABS("multidisciplinary health") OR TITLE-ABS("multidisciplinary delivery") OR TITLE-ABS("multidisciplinary system") OR TITLE-ABS("multidisciplinary team") OR TITLE-ABS("shared care") OR TITLE-ABS("shared health") OR TITLE-ABS("shared delivery") OR TITLE-ABS("shared system") OR TITLE-ABS("shared team") OR TITLE-ABS("joint care") OR TITLE-ABS("joint health") OR TITLE-ABS("joint delivery") OR TITLE-ABS("joint system") OR TITLE-ABS("joint team")(406261)

#4 ((INDEXTERMS("randomized controlled trial") OR INDEXTERMS("random allocation") OR INDEXTERMS("double-blind method") OR INDEXTERMS("single-blind method") OR INDEXTERMS("clinical trial") OR ALL("clinical trial") OR TITLE-ABS("single blind") OR TITLE-ABS("double blind") OR TITLE-ABS("triple blind") OR ALL("random\*") OR

ALL("placebo") OR ALL("controlled trial")  
OR ALL("controlled method") OR ALL("controlled study") OR ALL("prospective trial") OR  
ALL("prospective method")  
OR ALL("prospective study") OR ALL("crossover trial") OR ALL("crossover design") OR  
ALL("cross-over trial")  
OR ALL("cross-over design")) AND NOT (INDEXTERMS(animal) AND NOT  
(INDEXTERMS(animal) AND INDEXTERMS(human))))(11363558)  
#1 AND #2 AND #3 AND #4 (1124)

Embase:

|                                                                                                                                                                                                 |            |             |
|-------------------------------------------------------------------------------------------------------------------------------------------------------------------------------------------------|------------|-------------|
| #61. #9 AND #20 AND #40 AND #60                                                                                                                                                                 | 6,148      | 21 Oct 2020 |
| #60. #55 NOT #59                                                                                                                                                                                | 7,703,912  | 21 Oct 2020 |
| #59. #56 NOT #58                                                                                                                                                                                | 5,506,668  | 21 Oct 2020 |
| #58. #56 AND #57                                                                                                                                                                                | 22,530,588 | 21 Oct 2020 |
| #57. 'human'/exp                                                                                                                                                                                | 22,530,588 | 21 Oct 2020 |
| #56. 'animal'/exp                                                                                                                                                                               | 28,037,256 | 21 Oct 2020 |
| #55. #41 OR #42 OR #43 OR #44 OR #45 OR #46 OR #47 OR<br>#48 OR #49 OR #50 OR #51 OR #52 OR #53 OR #54                                                                                          | 9,764,352  | 21 Oct 2020 |
| #54. 'cross-over trial' OR 'cross-over design'                                                                                                                                                  | 10,785     | 21 Oct 2020 |
| #53. 'crossover trial' OR 'crossover design'                                                                                                                                                    | 22,456     | 21 Oct 2020 |
| #52. 'prospective trial' OR 'prospective method' OR<br>'prospective study'                                                                                                                      | 702,528    | 21 Oct 2020 |
| #51. 'controlled trial':de OR 'controlled method':de<br>OR 'controlled study':de                                                                                                                | 7,971,587  | 21 Oct 2020 |
| #50. 'placebo'                                                                                                                                                                                  | 467,543    | 21 Oct 2020 |
| #49. 'random*'                                                                                                                                                                                  | 1,806,461  | 21 Oct 2020 |
| #48. 'single blind':ab,ti OR 'double blind':ab,ti OR<br>'triple blind':ab,ti                                                                                                                    | 215,769    | 21 Oct 2020 |
| #47. 'clinical trial'/exp                                                                                                                                                                       | 1,540,416  | 21 Oct 2020 |
| #46. 'clinical trial'                                                                                                                                                                           | 1,592,625  | 21 Oct 2020 |
| #45. 'single blind method'/exp                                                                                                                                                                  | 40,381     | 21 Oct 2020 |
| #44. 'double blind method'/exp                                                                                                                                                                  | 177,021    | 21 Oct 2020 |
| #43. 'random allocation'/exp                                                                                                                                                                    | 88,267     | 21 Oct 2020 |
| #42. 'randomized controlled trial'/exp                                                                                                                                                          | 625,462    | 21 Oct 2020 |
| #41. 'randomized controlled trial'                                                                                                                                                              | 825,630    | 21 Oct 2020 |
| #40. #21 OR #22 OR #23 OR #24 OR #25 OR #26 OR #27 OR<br>#28 OR #29 OR #30 OR #31 OR #32 OR #33 OR #34 OR<br>#35 OR #36 OR #37 OR #38 OR #39                                                    | 5,484,329  | 21 Oct 2020 |
| #39. 'joint care':ab,ti OR 'joint health':ab,ti OR<br>'joint delivery':ab,ti OR 'joint system':ab,ti OR<br>'joint team':ab,ti                                                                   | 1,663      | 21 Oct 2020 |
| #38. 'shared care':ab,ti OR 'shared health':ab,ti OR<br>'shared delivery':ab,ti OR 'shared system':ab,ti<br>OR 'shared team':ab,ti                                                              | 2,396      | 21 Oct 2020 |
| #37. 'multidisciplinary care':ab,ti OR<br>'multidisciplinary health':ab,ti OR<br>'multidisciplinary delivery':ab,ti OR<br>'multidisciplinary system':ab,ti OR<br>'multidisciplinary team':ab,ti | 34,038     | 21 Oct 2020 |
| #36. 'interdisciplinary care':ab,ti OR<br>'interdisciplinary health':ab,ti OR<br>'interdisciplinary delivery':ab,ti OR<br>'interdisciplinary system':ab,ti OR                                   | 7,586      | 21 Oct 2020 |

|                                                                                                                                                                 |           |             |
|-----------------------------------------------------------------------------------------------------------------------------------------------------------------|-----------|-------------|
| 'interdisciplinary team':ab,ti                                                                                                                                  |           |             |
| #35. 'integrated care':ab,ti OR 'integrated health':ab,ti OR 'integrated delivery':ab,ti OR 'integrated system':ab,ti OR 'integrated team':ab,ti                | 15,508    | 21 Oct 2020 |
| #34. 'collaborative care':ab,ti OR 'collaborative health':ab,ti OR 'collaborative delivery':ab,ti OR 'collaborative system':ab,ti OR 'collaborative team':ab,ti | 4,159     | 21 Oct 2020 |
| #33. 'case management':ab,ti                                                                                                                                    | 13,640    | 21 Oct 2020 |
| #32. 'case management'/exp                                                                                                                                      | 11,870    | 21 Oct 2020 |
| #31. 'primary health care'/exp                                                                                                                                  | 172,109   | 21 Oct 2020 |
| #30. 'community health services'/exp                                                                                                                            | 126,585   | 21 Oct 2020 |
| #29. 'patient management':ab,ti                                                                                                                                 | 28,812    | 21 Oct 2020 |
| #28. 'patient care management'/exp                                                                                                                              | 841,548   | 21 Oct 2020 |
| #27. 'patient-centered care'/exp                                                                                                                                | 841,548   | 21 Oct 2020 |
| #26. 'community based':ab,ti                                                                                                                                    | 76,553    | 21 Oct 2020 |
| #25. 'comprehensive health care':ab,ti                                                                                                                          | 1,038     | 21 Oct 2020 |
| #24. 'comprehensive health care'/exp                                                                                                                            | 5,411,539 | 21 Oct 2020 |
| #23. 'delivery of health care, integrated'/exp                                                                                                                  | 11,357    | 21 Oct 2020 |
| #22. 'patient centered care'                                                                                                                                    | 7,170     | 21 Oct 2020 |
| #21. 'patient care planning'/exp                                                                                                                                | 30,265    | 21 Oct 2020 |
| #20. #10 OR #11 OR #17 OR #18 OR #19                                                                                                                            | 559,724   | 21 Oct 2020 |
| #19. 'mood disorder':ab,ti                                                                                                                                      | 8,082     | 21 Oct 2020 |
| #18. 'affective disorder':ab,ti                                                                                                                                 | 9,255     | 21 Oct 2020 |
| #17. #12 OR #13 OR #14 OR #15 OR #16                                                                                                                            | 219,264   | 21 Oct 2020 |
| #16. (depress* NEAR/3 unipolar):ab,ti                                                                                                                           | 6,458     | 21 Oct 2020 |
| #15. (depress* NEAR/3 scale*):ab,ti                                                                                                                             | 66,139    | 21 Oct 2020 |
| #14. (depress* NEAR/3 score*):ab,ti                                                                                                                             | 27,859    | 21 Oct 2020 |
| #13. (depress* NEAR/3 symptom*):ab,ti                                                                                                                           | 103,708   | 21 Oct 2020 |
| #12. (depress* NEAR/3 disorder*):ab,ti                                                                                                                          | 78,796    | 21 Oct 2020 |
| #11. 'depressive disorder'/exp                                                                                                                                  | 507,733   | 21 Oct 2020 |
| #10. 'depression'/exp                                                                                                                                           | 507,733   | 21 Oct 2020 |
| #9. #5 NOT #8                                                                                                                                                   | 1,132,703 | 21 Oct 2020 |
| #8. #6 OR #7                                                                                                                                                    | 16,759    | 21 Oct 2020 |
| #7. 'diabetes':ab,ti AND 'insipidus':ab,ti                                                                                                                      | 11,241    | 21 Oct 2020 |
| #6. 'diabetes insipidus'/exp                                                                                                                                    | 15,303    | 21 Oct 2020 |
| #5. #1 OR #2 OR #3 OR #4                                                                                                                                        | 1,145,139 | 21 Oct 2020 |
| #4. iddm:ab,ti OR niddm:ab,ti OR mody:ab,ti OR t1dm:ab,ti OR t2dm:ab,ti OR t1d:ab,ti OR t2d:ab,ti                                                               | 93,618    | 21 Oct 2020 |
| #3. diabetes:ab,ti                                                                                                                                              | 809,994   | 21 Oct 2020 |
| #2. 'diabetes complications'/exp                                                                                                                                | 152,553   | 21 Oct 2020 |
| #1. 'diabetes mellitus'/exp                                                                                                                                     | 1,015,811 | 21 Oct 2020 |
