# Supplementary material for: Effectiveness of Collaborative Care for Depression and HbA1c in Patients with Depression and Diabetes: A Systematic Review and Meta-Analysis
Source: PubMed Central journal article supplement (PMC9438466; doi:10.5334/ijic.6443), 2022-08-30
Supplement: ijic-22-3-6443-s2.pdf [file ijic-22-3-6443-s2.pdf]

Appendix 2: Risk of Bias Assessment for the Included Studies

| Studies             | Year | Selection bias             |                        | Performance bias                       | Detection bias                 | Attrition bias          | Reporting bias      | Other bias |
|---------------------|------|----------------------------|------------------------|----------------------------------------|--------------------------------|-------------------------|---------------------|------------|
|                     |      | Random sequence generation | Allocation concealment | Blinding of participants and personnel | Blinding of outcome assessment | Incomplete outcome data | Selective reporting |            |
| Kathleen Ell        | 2005 | +                          | +                      | -                                      | ?                              | +                       | +                   | +          |
| de Vries McClintock | 2014 | +                          | -                      | -                                      | ?                              | +                       | ?                   | -          |
| Ali                 | 2015 | +                          | +                      | -                                      | +                              | +                       | +                   | +          |
| Naik                | 2012 | +                          | +                      | -                                      | +                              | ?                       | +                   | +          |
| Williams Jr         | 1999 | +                          | +                      | -                                      | +                              | ?                       | +                   | ?          |
| Bogner              | 2010 | +                          | -                      | -                                      | +                              | +                       | ?                   | ?          |
| Bogner              | 2007 | +                          | ?                      | -                                      | +                              | +                       | +                   | -          |
| Kathleen Ell        | 2005 | +                          | +                      | -                                      | +                              | ?                       | ?                   | ?          |
| Katon               | 2001 | +                          | +                      | -                                      | +                              | ?                       | +                   | ?          |
| Kathleen Ell        | 2013 | +                          | +                      | -                                      | +                              | +                       | +                   | +          |
| Cummings            | 2017 | +                          | +                      | -                                      | -                              | ?                       | +                   | ?          |
| Johnson             | 2010 | -                          | -                      | -                                      | +                              | +                       | +                   | ?          |

Notes: - high risk of bias; + low risk of bias; ? unclear risk of bias.
